# Supplementary material for: Body composition and short-term mortality in patients critically ill with acute-on-chronic liver failure
Source: PubMed Central journal article supplement (PMC10403365; doi:10.1016/j.jhepr.2023.100758), 2023-04-07
Supplement: mmc1.pdf [file mmc1.pdf]

**Supplemental information**

**Body composition and short-term mortality in patients critically ill with acute-on-chronic liver failure**

**Thomas Mangana del Rio, Sophie-Caroline Sacleux, Julien Vionnet, Philippe Ichaï, Alban Denys, Antoine Schneider, Audrey Coilly, Montserrat Fraga, Alexandre Wetzel, Joachim Koerfer, Jean-Daniel Chiche, Faouzi Saliba, Darius Moradpour, Fabio Becce, and Florent Artru**

**Supplementary materials**

**Body composition and short-term mortality in critically ill patients  
with acute on chronic liver failure**

Thomas Mangana del Rio, Sophie-Caroline Sacleux, Julien Vionnet, Philippe Ichaï, Alban Denys, Antoine Schneider, Audrey Coilly, Montserrat Fraga, Alexandre Wetzel, Joachim Koerfer, Jean-Daniel Chiche, Faouzi Saliba, Darius Moradpour, Fabio Becce and Florent Artru

**Table of contents**

Patients and Methods.....page 2  
Figures.....page 3  
Tables.....page 6

## Patients and Methods

### 1. ICD-10 codes

The following ICD-10 codes were used to retrospectively screen for the presence of liver cirrhosis:

- chronic liver disease: K70.0, K70.2, K73.X, K754, K758, K75.9, K76.0, B18.0, B18.1, B18.2, B18.8, B18.9
- cirrhosis codes: K70.30, K70.31, K71.7, K72.1, K74.4, K74.5, K74.60, K74.69, K74.3, K72.1, K72.9
- alcoholic liver disease: K70.4, K70.9
- ascites and spontaneous bacterial peritonitis: R18.8, K70.31, K70.11 K65.2, K65.0, K65.9
- varices: I85.9, I85.00, I86.4, I98.2, I85.10 I85.01, I98.3, I85.11
- hepatic encephalopathy: K70.41, K72.11, K72.91, B15.0, B16.0, B16.2, 17.11, B19.0, B19.11, B19.21, G31.2, G93.4
- portal hypertension and hepatorenal syndrome: K76.6, K76.7

### 2. Definition and site of infection

Diagnostic criteria for bacterial infections were the following:

- spontaneous bacterial peritonitis: polymorphonuclear (PMN) cell count in ascitic fluid  $\geq 250/\text{mm}^3$ ;
- urinary tract infection: abnormal urinary sediment ( $> 10$  leukocytes/field) and positive urinary culture;
- bacteraemia: positive blood cultures;
- pneumonia: clinical signs of infection and new infiltrates on chest x-ray;
- skin and soft tissue infections: clinical signs of infection, swelling, erythema, heat and tenderness in the skin;
- cholangitis: cholestasis, right upper quadrant pain and/or jaundice and radiological evidence for biliary obstruction;
- secondary peritonitis: PMN count in ascitic fluid  $\geq 250/\text{mm}^3$  and evidence (abdominal CT/surgery) of an intraabdominal source of infection;
- *Clostridioides difficile* infection: positive stool toxin in a patient with diarrhea.

The other infections were diagnosed according to conventional criteria.

**Fig. S1. Flowchart of patient inclusion from the Lausanne cohort.** ACLF, acute-on-chronic liver failure; ICU, intensive care unit.

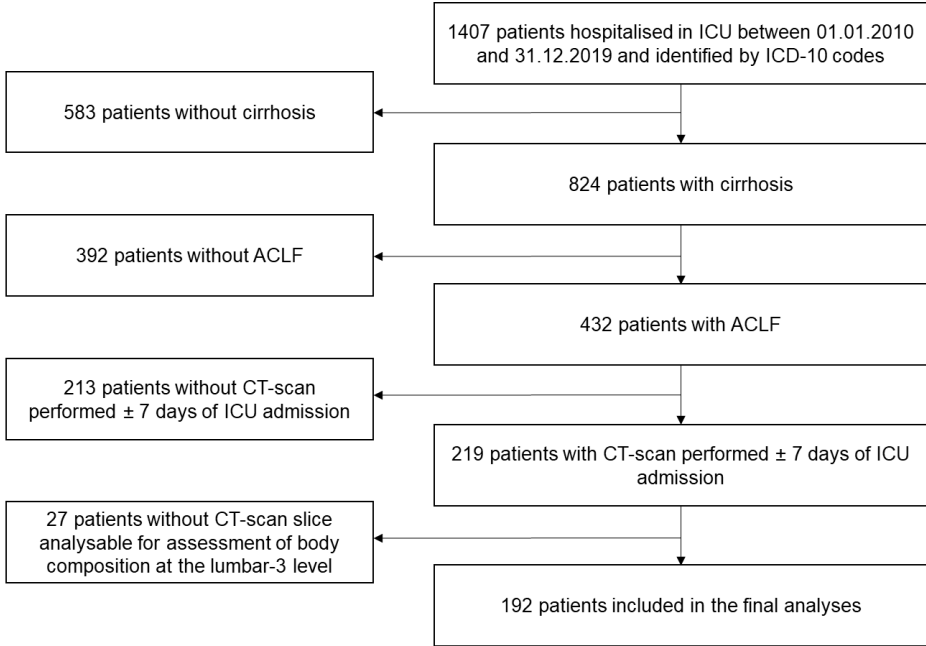

**Fig. S2.** Performances of the available and newly developed models (Model d1 and d3) in male patients from the Lausanne cohort. **(A)** Receiver operating characteristic curves for survival at 28 days in the male patients' cohort as determined by the Model d1 (0.78 [0.68-0.85]) and Model d3 (0.90 [0.83-0.94]) vs. the CLIF-C ACLF-lactate score on day 1 (0.69 [0.59-0.78],  $p=0.002$ ) and day 3 (0.86 [0.78-0.91],  $p=0.04$ ). **(B)** Kaplan-Meier survival analysis of the male patients' cohort according to the Model d1 (cut-off  $\leq 0.49$ ). **(C)** Kaplan-Meier survival analysis of the male patients' cohort according to the Model d3 (cut-off  $\leq 0.71$ ).

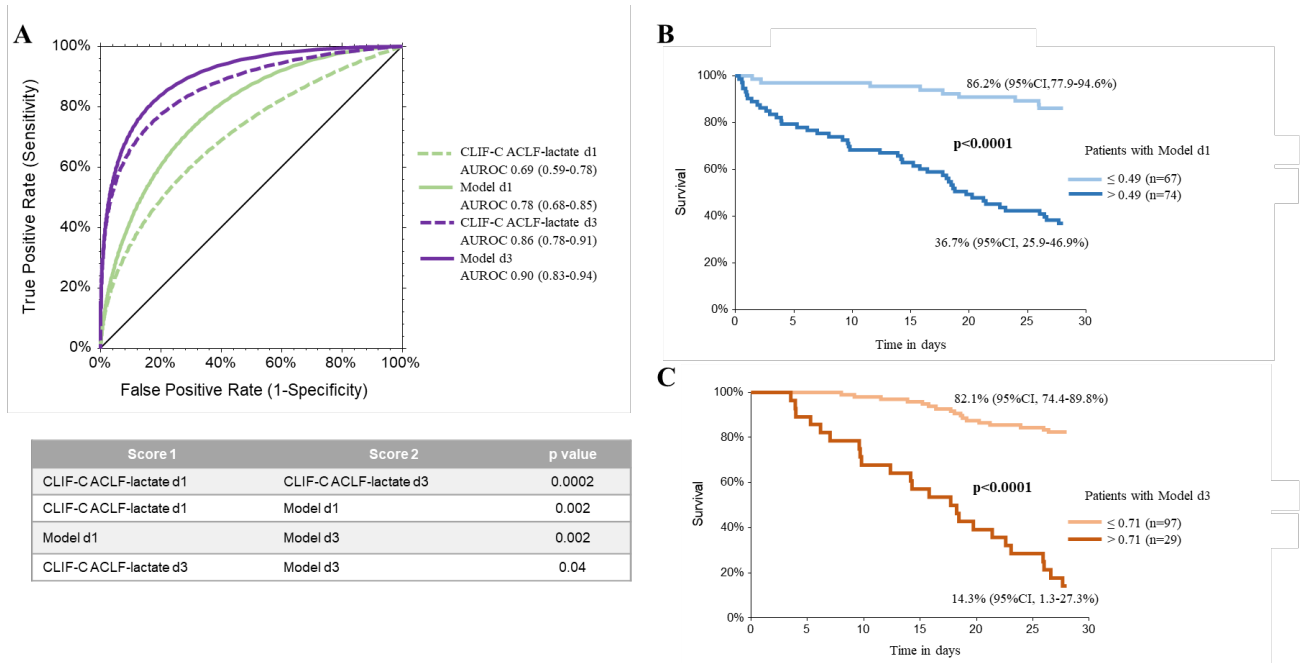

**Fig. S3:** Performances of the available and newly developed models (Model d1 and d3) in female patients from the Lausanne cohort. **(A)** Receiver operating characteristic curves for survival at 28 days in female patients' cohort as determined by the Model d1 (0.91 [0.79-0.96]) and Model d3 (0.93 [0.81-0.97]) vs. the CLIF-C ACLF-lactate score on day 1 (0.90 [0.75-0.95],  $p=0.62$ ) and day 3 (0.93 [0.81-0.98],  $p=0.91$ ). **(B)** Kaplan-Meier survival analysis of the female patients' cohort according to the Model d1 (cut-off  $\leq 0.49$ ). **(C)** Kaplan-Meier survival analysis of the female patients' cohort according to the Model d3 (cut-off  $\leq 0.71$ ).

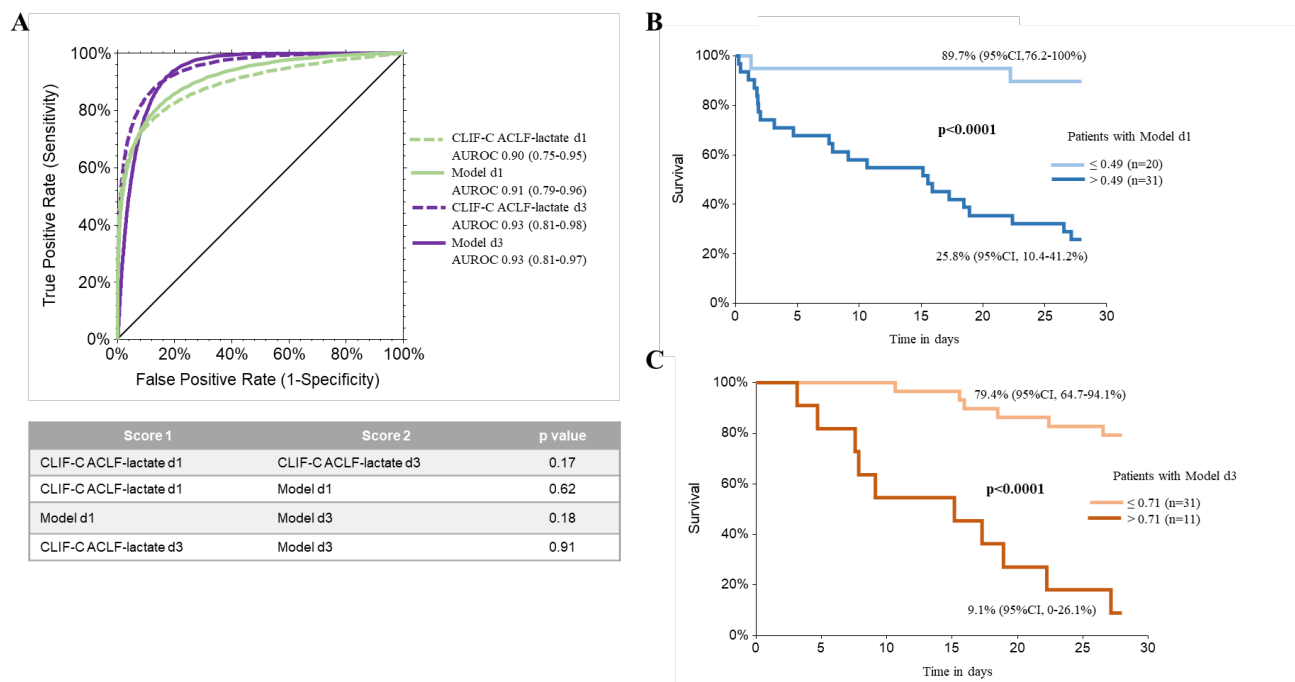

Mangana del Rio *et al.*

Supplementary Figure 3

**Table S1:** Comparison of the main characteristics on day 1 between patients from Lausanne included in the final analyses (n=192) and patients with cirrhosis and ACLF not included in the final analyses (CT not performed or absence of CT-scan slice allowing for body composition evaluation) (n=240). Continuous and categorical variables are expressed respectively in median (interquartile range) and N (percentages). Comparisons were performed using the Student's t-test or Mann-Whitney U test for quantitative variables or Chi-Square and Fisher exact tests for categorical variables as appropriate

| Characteristics                | Overall population included in the final analyses (n=192) | Patients with cirrhosis and ACLF not included in the final analyses (CT not performed or absence of CT-scan slice allowing for body composition evaluation) (n=240) | p    |
|--------------------------------|-----------------------------------------------------------|---------------------------------------------------------------------------------------------------------------------------------------------------------------------|------|
| Age (years)                    | 62.0 (53.2-70.0)                                          | 63.0 (54.0-70.8)                                                                                                                                                    | 0.72 |
| Sex (male)                     | 141 (73.5)                                                | 181 (76.7)                                                                                                                                                          | 0.45 |
| BMI (kg/m <sup>2</sup> )       | 25.8 (22.3-31.2)                                          | 26.1 (22.7 – 28.8)                                                                                                                                                  | 0.36 |
| Ethnicity                      |                                                           |                                                                                                                                                                     |      |
| Caucasian                      | 161 (83.8)                                                | 178 (74.2)                                                                                                                                                          | 0.09 |
| Hispanic                       | 16 (8.3)                                                  | 34 (14.2)                                                                                                                                                           |      |
| Other                          | 15 (7.8)                                                  | 28 (11.7)                                                                                                                                                           |      |
| <b>Aetiology</b>               |                                                           |                                                                                                                                                                     |      |
| Alcohol                        | 129 (67.2)                                                | 167 (70.7)                                                                                                                                                          | 0.96 |
| Viral                          | 34 (17.7)                                                 | 35 (14.8)                                                                                                                                                           |      |
| Metabolic                      | 18 (9.4)                                                  | 20 (8.5)                                                                                                                                                            |      |
| Other                          | 11 (5.7)                                                  | 14 (6.0)                                                                                                                                                            |      |
| <b>Cause for ICU admission</b> |                                                           |                                                                                                                                                                     |      |
| Sepsis                         | 79 (41.1)                                                 | 82 (34.2)                                                                                                                                                           | 0.22 |
| Bleeding                       | 63 (32.8)                                                 | 94 (39.1)                                                                                                                                                           |      |
| Other                          | 50 (26.1)                                                 | 64 (26.7)                                                                                                                                                           |      |
| <b>Laboratory on day 1</b>     |                                                           |                                                                                                                                                                     |      |
| Leukocytes (G/l)               | 15.0 (10.1-20.8)                                          | 13.6 (9.7-19.3)                                                                                                                                                     | 0.04 |
| INR                            | 1.5 (1.3-1.8)                                             | 1.4 (1.2-1.7)                                                                                                                                                       | 0.07 |
| Bilirubin (mg/dl)              | 5.3 (3.7-8.2)                                             | 4.5 (3.3-6.6)                                                                                                                                                       | 0.32 |
| AST (IU)                       | 93.0 (48.0-299.5)                                         | 80 (44.0-268.0)                                                                                                                                                     | 0.31 |
| Albumin (g/l)                  | 27.0 (23.2-31.0)                                          | 28.0 (24.0-32.0)                                                                                                                                                    | 0.26 |
| Creatinine (mg/dl)             | 1.4 (1.0-2.1)                                             | 1.4 (0.8-2.3)                                                                                                                                                       | 0.28 |
| Sodium (mmol/l)                | 138.0 (134.0-141.0)                                       | 138.0 (134.0-141.0)                                                                                                                                                 | 0.83 |
| Lactate (mmol/l)               | 4.1 (2.4-7.4)                                             | 3.0 (2.0-5.4)                                                                                                                                                       | 0.21 |
| Ammonia, (µmol/l)              | 71.0 (53.0-112.0)                                         | 65.0 (45-101)                                                                                                                                                       | 0.47 |
| CRP (mg/l)                     | 55.0 (20.0-112.5)                                         | 39.0 (13.0-92.0)                                                                                                                                                    | 0.02 |
| <b>ACLF grade on day 1</b>     |                                                           |                                                                                                                                                                     |      |
| 0                              | 0 (0)                                                     | 0 (0)                                                                                                                                                               | 0.09 |
| 1                              | 26 (13.6)                                                 | 22 (9.1)                                                                                                                                                            |      |
| 2                              | 59 (30.7)                                                 | 95 (39.6)                                                                                                                                                           |      |
| 3                              | 107 (55.7)                                                | 123 (51.3)                                                                                                                                                          |      |
| <b>Scores on day 1</b>         |                                                           |                                                                                                                                                                     |      |
| MELD                           | 21.9 (15.1-27.9)                                          | 19.1 (14.4-28.6)                                                                                                                                                    | 0.30 |
| CLIF-C ACLF                    | 67.5 (51.8-72.7)                                          | 66.6 (61.5-72.1)                                                                                                                                                    | 0.64 |
| CLIF-C ACLF-lactate            | 71.5 (64.1-80.2)                                          | 69.5 (62.7-78.3)                                                                                                                                                    | 0.08 |

**Table S2:** Comparison of the main characteristics on day 1 between patients included in the final analyses (n=192) and patients with cirrhosis and without ACLF in whom a CT was performed at admission to the intensive care unit (ICU) ± 7 days (n=131). Continuous and

|                                                     | Overall population included in the final analyses (n=192) | Cirrhotic patients without ACLF who underwent a CT on admission ± 7 days (n=131) | p       |
|-----------------------------------------------------|-----------------------------------------------------------|----------------------------------------------------------------------------------|---------|
| <b>Characteristics</b>                              |                                                           |                                                                                  |         |
| Age (years)                                         | 62.0 (53.2-70.0)                                          | 66.0 (50.0-75.0)                                                                 | 0.89    |
| Sex (male)                                          | 141 (73.5)                                                | 93 (70.9)                                                                        | 0.24    |
| BMI (kg/m <sup>2</sup> )                            | 25.8 (22.3-31.2)                                          | 25.4 (21.4 – 27.6)                                                               | 0.58    |
| Ethnicity                                           |                                                           |                                                                                  |         |
| Causasian                                           | 161 (83.8)                                                | 102 (77.9)                                                                       | 0.18    |
| Hispanic                                            | 16 (8.3)                                                  | 13 (9.9)                                                                         |         |
| Other                                               | 15 (7.8)                                                  | 14 (10.7)                                                                        |         |
| Clinical frailty scale (score)                      | 4.0 (3.0-4.0)                                             | 3.0 (2.0-4.0)                                                                    | 0.02    |
| <b>Aetiology</b>                                    |                                                           |                                                                                  |         |
| Alcohol                                             | 129 (67.2)                                                | 99 (75.6)                                                                        | 0.007   |
| Viral                                               | 34 (17.7)                                                 | 6 (4.5)                                                                          |         |
| Metabolic                                           | 18 (9.4)                                                  | 20 (15.4)                                                                        |         |
| Other                                               | 11 (5.7)                                                  | 6 (4.5)                                                                          |         |
| <b>Cause for ICU admission</b>                      |                                                           |                                                                                  |         |
| Sepsis                                              | 79 (41.1)                                                 | 10 (7.6)                                                                         | <0.0001 |
| Bleeding                                            | 63 (32.8)                                                 | 58 (44.3)                                                                        |         |
| Other                                               | 50 (26.1)                                                 | 63 (48.1)                                                                        |         |
| <b>Laboratory on day 1</b>                          |                                                           |                                                                                  |         |
| Leukocytes (G/l)                                    | 15.0 (10.1-20.8)                                          | 11.6 (7.2-16.7)                                                                  | 0.03    |
| INR                                                 | 1.5 (1.3-1.8)                                             | 1.3 (1.1-1.6)                                                                    | 0.009   |
| Bilirubin (mg/dl)                                   | 5.3 (3.7-8.2)                                             | 4.2 (3.3-5.6)                                                                    | 0.001   |
| AST (IU)                                            | 93.0 (48.0-299.5)                                         | 73 (34.0-168.0)                                                                  | 0.07    |
| Albumin (g/l)                                       | 27.0 (23.2-31.0)                                          | 32.0 (27.0-38.0)                                                                 | 0.007   |
| Creatinine (mg/dl)                                  | 1.4 (1.0-2.1)                                             | 1.1 (0.7-1.9)                                                                    | 0.03    |
| Sodium (mmol/l)                                     | 138.0 (134.0-141.0)                                       | 138.0 (134.0-142.0)                                                              | 0.93    |
| Lactate (mmol/l)                                    | 4.1 (2.4-7.4)                                             | 2.4 (1.3-3.8)                                                                    | 0.21    |
| Ammonia, (µmol/l)                                   | 71.0 (53.0-112.0)                                         | 61.0 (41-92)                                                                     | 0.47    |
| CRP (mg/l)                                          | 55.0 (20.0-112.5)                                         | 45.0 (18.0-98.0)                                                                 | 0.07    |
| <b>ACLF grade on day 1</b>                          |                                                           |                                                                                  |         |
| 0                                                   | 0 (0)                                                     | 131 (100)                                                                        | <0.0001 |
| 1                                                   | 26 (13.6)                                                 | 0 (0)                                                                            |         |
| 2                                                   | 59 (30.7)                                                 | 0 (0)                                                                            |         |
| 3                                                   | 107 (55.7)                                                | 0 (0)                                                                            |         |
| <b>Scores on day 1</b>                              |                                                           |                                                                                  |         |
| MELD                                                | 21.9 (15.1-27.9)                                          | 16.1 (12.4-21.6)                                                                 | <0.0001 |
| CLIF-C ACLF                                         | 67.5 (51.8-72.7)                                          | 46.8 (41.4-51.1)                                                                 | <0.0001 |
| CLIF-C ACLF-lactate                                 | 71.5 (64.1-80.2)                                          | 47.1 (42.1-52.3)                                                                 | <0.0001 |
| <b>Outcome</b>                                      |                                                           |                                                                                  |         |
| 28-day survival, % (95%CI)                          | 58.2 (51.2-65.2)                                          | 94.5 (90.1-98.5)                                                                 | <0.0001 |
| <b>Body composition parameters</b>                  |                                                           |                                                                                  |         |
| L3SMI (cm <sup>2</sup> /m <sup>2</sup> )            | 43.2 (37.1-50.1)                                          | 46.8 (36.3-57.8)                                                                 | 0.009   |
| Sarcopenia according to L3SMI sex specific cut-offs | 121 (63.0)                                                | 61 (46.5)                                                                        | 0.01    |
| SMRA (HU)                                           | 36.0 (31.0-41.0)                                          | 39.9 (28.6-47.2)                                                                 | 0.08    |
| IMATI (cm <sup>2</sup> /m <sup>2</sup> )            | 6.3 (3.9-10.0)                                            | 4.9 (2.8-7.9)                                                                    | 0.01    |
| VATI (cm <sup>2</sup> /m <sup>2</sup> )             | 44.3 (24.4-69.9)                                          | 49.4 (22.6-87.1)                                                                 | 0.03    |
| SATI (cm <sup>2</sup> /m <sup>2</sup> )             | 48.6 (27.0-70.3)                                          | 53.0 (31.1-78.9)                                                                 | 0.01    |
| VSR                                                 | 0.9 (0.6-1.4)                                             | 0.9 (0.6-1.8)                                                                    | 0.18    |
| VAT-RA (HU)                                         | -81.2 (-88.5 to -75.8)                                    | -84.5 (-92.8 to -78.8)                                                           | 0.002   |
| SAT-RA (HU)                                         | -86.6 (-95.7 to -76.8)                                    | -88.3 (-100.1 to -75.2)                                                          | 0.02    |

categorical variables are expressed in median (interquartile range) and N (percentages), respectively. Comparisons were performed using the Student's t-test or Mann-Whitney U test for quantitative variables or Chi-Square and Fisher exact tests for categorical variables as appropriate



**Table S3:** Univariable and multivariable analyses of predictors of 28-days mortality in male patients from Lausanne cohort on day 1 (n=141)

| Covariant                                 | Univariable analysis |            |         | Multivariable analysis |           |         |
|-------------------------------------------|----------------------|------------|---------|------------------------|-----------|---------|
|                                           | OR                   | 95% CI     | p value | OR                     | 95% CI    | p value |
| <b>Characteristics</b>                    |                      |            |         |                        |           |         |
| Age (years)                               | 0.99                 | 0.96-1.02  | 0.6     |                        |           |         |
| Sex (male)                                | -                    | -          | -       |                        |           |         |
| BMI (kg/m <sup>2</sup> )                  | 1.03                 | 0.96-1.10  | 0.4     |                        |           |         |
| Ethnicity                                 |                      |            |         |                        |           |         |
| Caucasian                                 | -                    | -          | -       |                        |           |         |
| Hispanic                                  | 2.42                 | 0.82-5.03  | 0.15    |                        |           |         |
| Other                                     | 0.81                 | 0.11-6.21  | 0.45    |                        |           |         |
| Clinical frailty scale (score)            | 1.05                 | 0.81-1.92  | 0.22    |                        |           |         |
| <b>Aetiology</b>                          |                      |            |         |                        |           |         |
| Alcohol                                   | -                    | -          | -       | -                      | -         | -       |
| Viral                                     | 2.26                 | 0.98-5.23  | 0.06    | 2.09                   | 0.71-6.13 | 0.17    |
| Metabolic                                 | 0.57                 | 0.14-2.28  | 0.43    | 0.54                   | 0.09-3.07 | 0.48    |
| Other                                     | 0.34                 | 0.04-3.09  | 0.34    | 0.29                   | 0.03-3.02 | 0.30    |
| <b>Cause for ICU admission</b>            |                      |            |         |                        |           |         |
| Sepsis                                    | -                    | -          | -       | -                      | -         | -       |
| Bleeding                                  | 0.43                 | 0.19-0.95  | 0.04    | 0.79                   | 0.28-2.16 | 0.64    |
| Other                                     | 0.59                 | 0.23-1.49  | 0.26    | 0.81                   | 0.22-2.95 | 0.75    |
| <b>Laboratory</b>                         |                      |            |         |                        |           |         |
| Leukocytes (G/l)                          | 1.00                 | 0.96-1.03  | 0.91    |                        |           |         |
| INR                                       | 3.23                 | 1.61-6.49  | 0.0009  |                        |           |         |
| Bilirubin (mg/dl)                         | 1.11                 | 1.04-1.20  | 0.002   |                        |           |         |
| AST (IU)                                  | 1.00                 | 0.99-1.01  | 0.11    |                        |           |         |
| Albumin (g/l)                             | 0.98                 | 0.89-1.02  | 0.24    |                        |           |         |
| Creatinine (mg/dl)                        | 1.46                 | 1.05-2.04  | 0.02    |                        |           |         |
| Sodium (mmol/l)                           | 0.98                 | 0.93-1.03  | 0.62    |                        |           |         |
| Lactate (mmol/l)                          | 1.15                 | 1.08-1.24  | 0.0006  |                        |           |         |
| Ammonia, (μmol/l)                         | 1.00                 | 0.99-1.01  | 0.67    |                        |           |         |
| CRP (mg/l)                                | 0.99                 | 0.99-1.01  | 0.55    |                        |           |         |
| <b>Organ failure</b>                      |                      |            |         |                        |           |         |
| Liver                                     | 5.01                 | 1.67-15.01 | 0.003   |                        |           |         |
| Kidney                                    | 2.22                 | 1.08-4.60  | 0.02    |                        |           |         |
| Brain                                     | 1.06                 | 0.92-1.89  | 0.16    |                        |           |         |
| Coagulation                               | 5.24                 | 2.10-14.28 | 0.0005  |                        |           |         |
| Circulation                               | 4.71                 | 1.03-21.80 | 0.02    |                        |           |         |
| Lungs                                     | 1.63                 | 1.03-3.22  | 0.02    |                        |           |         |
| <b>Organ support</b>                      |                      |            |         |                        |           |         |
| RRT                                       | 2.20                 | 1.10-6.33  | 0.02    |                        |           |         |
| Vasopressors                              | 4.71                 | 1.03-21.80 | 0.02    |                        |           |         |
| Mechanical ventilation                    | 4.11                 | 1.33-12.75 | 0.01    |                        |           |         |
| <b>Scores</b>                             |                      |            |         |                        |           |         |
| MELD                                      | 1.08                 | 1.04-1.13  | <0.0001 |                        |           |         |
| ACLF grade                                | 3.43                 | 1.85-6.34  | <0.0001 |                        |           |         |
| CLIF-C ACLF                               | 1.07                 | 1.03-1.12  | 0.001   |                        |           |         |
| CLIF-C ACLF lactate                       | 1.09                 | 1.04-1.14  | <0.0001 | 1.08                   | 1.03-1.13 | 0.0003  |
| <b>Body composition parameters</b>        |                      |            |         |                        |           |         |
| L3SMI (cm <sup>2</sup> /m <sup>2</sup> )* | 0.95                 | 0.91-0.98  | 0.03    | 0.97                   | 0.94-1.01 | 0.07    |
| Sarcopenia (L3SMI cut-offs)*              | 3.91                 | 1.74-8.75  | 0.0009  | 3.21                   | 1.13-9.05 | 0.03    |
| SMRA (HU)                                 | 0.98                 | 0.93-1.03  | 0.50    |                        |           |         |
| IMATI (cm <sup>2</sup> /m <sup>2</sup> )  | 0.97                 | 0.91-1.03  | 0.37    |                        |           |         |
| VATI (cm <sup>2</sup> /m <sup>2</sup> )   | 0.99                 | 0.98-1.01  | 0.35    |                        |           |         |
| SATI (cm <sup>2</sup> /m <sup>2</sup> )   | 1.00                 | 0.99-1.01  | 0.40    |                        |           |         |
| VSR                                       | 0.61                 | 0.33-1.26  | 0.21    |                        |           |         |
| VAT-RA (HU) †                             | 1.04                 | 1.01-1.09  | 0.05    | 1.03                   | 0.97-1.09 | 0.24    |
| SAT-RA (HU) †                             | 1.02                 | 0.99-1.05  | 0.09    | 1.02                   | 0.98-1.05 | 0.27    |
| SAT-RA (HU), according to (27)            | 1.42                 | 0.53-3.81  | 0.48    |                        |           |         |

\*Not included in the multivariable analysis to avoid collinearity with sarcopenia according to L3SMI sex specific cut-offs.

¶ Not included in the multivariable analysis to collinearity (Spearman: 0.78 DF 102,  $p < 0.0001$ ).

**Table S4:** Univariable and multivariable analyses of predictors of 28-days mortality female patients from Lausanne cohort on day 1 (n=51)

| Covariant                                | Univariable analysis |            |         | Multivariable analysis |           |         |
|------------------------------------------|----------------------|------------|---------|------------------------|-----------|---------|
|                                          | OR                   | 95% CI     | p value | OR                     | 95% CI    | p value |
| <b>Characteristics</b>                   |                      |            |         |                        |           |         |
| Age (years)                              | 1.03                 | 0.98-1.08  | 0.6     |                        |           |         |
| Sex (male)                               | -                    | -          | -       |                        |           |         |
| BMI (kg/m <sup>2</sup> )                 | 1.00                 | 0.89-1.12  | 0.9     |                        |           |         |
| Ethnicity                                |                      |            |         |                        |           |         |
| Caucasian                                | -                    | -          | -       |                        |           |         |
| Hispanic                                 | 4.58                 | 0.27-9.33  | 0.23    |                        |           |         |
| Other                                    | 0.89                 | 0.21-8.12  | 0.67    |                        |           |         |
| Clinical frailty score                   | 1.08                 | 0.63-2.20  | 0.61    |                        |           |         |
| <b>Aetiology</b>                         |                      |            |         |                        |           |         |
| Alcohol                                  | -                    | -          | -       |                        |           |         |
| Viral                                    | 1.11                 | 0.14-8.22  | 0.91    |                        |           |         |
| Metabolic                                | 1.11                 | 0.19-6.290 | 0.89    |                        |           |         |
| Other                                    | 1.67                 | 0.24-11.26 | 0.59    |                        |           |         |
| <b>Cause for ICU admission</b>           |                      |            |         |                        |           |         |
| Sepsis                                   | -                    | -          | -       |                        |           |         |
| Bleeding                                 | 0.76                 | 0.16-3.33  | 0.70    |                        |           |         |
| Other                                    | 0.82                 | 0.24-2.83  | 0.75    |                        |           |         |
| <b>Laboratory</b>                        |                      |            |         |                        |           |         |
| Leukocytes (G/l)                         | 1.09                 | 1.04-1.14  | <0.0001 |                        |           |         |
| INR                                      | 5.97                 | 2.84-12.54 | <0.0001 |                        |           |         |
| Bilirubin (mg/dl)                        | 1.08                 | 1.03-1.13  | 0.0004  |                        |           |         |
| AST (IU)                                 | 1.00                 | 0.99-1.01  | 0.31    |                        |           |         |
| Albumin (g/l)                            | 1.07                 | 1.00-1.15  | 0.03    |                        |           |         |
| Creatinine (mg/dl)                       | 1.16                 | 0.70-1.95  | 0.55    |                        |           |         |
| Sodium (mmol/l)                          | 1.01                 | 0.93-1.10  | 0.72    |                        |           |         |
| Lactate (mmol/l)                         | 1.16                 | 1.02-1.32  | 0.02    |                        |           |         |
| Ammonia, (µmol/l)                        | 1.00                 | 0.99-1.01  | 0.32    |                        |           |         |
| CRP (mg/l)                               | 1.00                 | 0.99-1.01  | 0.89    |                        |           |         |
| <b>Organ failure</b>                     |                      |            |         |                        |           |         |
| Liver                                    | 2.28                 | 1.02-13.76 | 0.04    |                        |           |         |
| Kidney                                   | 1.76                 | 0.87-5.57  | 0.09    |                        |           |         |
| Brain                                    | 1.05                 | 0.76-3.61  | 0.23    |                        |           |         |
| Coagulation                              | 1.64                 | 1.03-6.04  | 0.03    |                        |           |         |
| Circulation                              | 4.23                 | 0.78-22.84 | 0.09    |                        |           |         |
| Lungs                                    | 4.78                 | 1.46-15.60 | 0.009   |                        |           |         |
| <b>Organ support</b>                     |                      |            |         |                        |           |         |
| RRT                                      | 3.78                 | 1.02-20.94 | 0.03    |                        |           |         |
| Vasopressors                             | 4.23                 | 0.78-22.84 | 0.09    |                        |           |         |
| Mechanical ventilation                   | 10.66                | 1.22-93.12 | 0.03    |                        |           |         |
| <b>Scores</b>                            |                      |            |         |                        |           |         |
| MELD                                     | 1.09                 | 1.01-1.18  | 0.04    |                        |           |         |
| ACLF grade                               | 11.69                | 2.92-46.85 | 0.0005  |                        |           |         |
| CLIF-C ACLF                              | 1.26                 | 1.11-1.50  | 0.0006  |                        |           |         |
| CLIF-C ACLF lactate                      | 1.26                 | 1.11-1.43  | 0.0004  | 1.26                   | 1.11-1.43 | 0.0004  |
| <b>Body composition parameters</b>       |                      |            |         |                        |           |         |
| L3SMI (cm <sup>2</sup> /m <sup>2</sup> ) | 3.41                 | 0.23-48.97 | 0.40    |                        |           |         |
| Sarcopenia (L3SMI cut-offs)              | 2.47                 | 0.79-7.75  | 0.11    |                        |           |         |
| SMRA (HU)                                | 0.99                 | 0.91-1.08  | 0.85    |                        |           |         |
| IMATI (cm <sup>2</sup> /m <sup>2</sup> ) | 0.99                 | 0.91-1.03  | 0.91    |                        |           |         |
| VATI (cm <sup>2</sup> /m <sup>2</sup> )  | 1.00                 | 0.98-1.03  | 0.54    |                        |           |         |
| SATI (cm <sup>2</sup> /m <sup>2</sup> )  | 1.00                 | 0.98-1.01  | 0.76    |                        |           |         |
| VSR                                      | 1.56                 | 0.62-4.68  | 0.45    |                        |           |         |
| VAT-RA (HU)                              | 1.03                 | 0.98-1.10  | 0.18    |                        |           |         |
| SAT-RA (HU)                              | 1.04                 | 1.01-1.08  | 0.05    | 1.01                   | 0.98-1.07 | 0.18    |
| SAT-RA (HU), according to (27)           | 1.71                 | 0.46-6.39  | 0.42    |                        |           |         |

**Table S5:** Univariable and multivariable analyses of predictors of 28-days mortality in male patients from Lausanne cohort on day 3 (n=126)

| Covariant                                 | Univariable analysis |            |         | Multivariable analysis |            |         |
|-------------------------------------------|----------------------|------------|---------|------------------------|------------|---------|
|                                           | OR                   | 95% CI     | p value | OR                     | 95% CI     | p value |
| <b>Characteristics</b>                    |                      |            |         |                        |            |         |
| Age (years)                               | 0.99                 | 0.95-1.02  | 0.61    |                        |            |         |
| Sex (male)                                | -                    | -          | -       |                        |            |         |
| BMI (kg/m <sup>2</sup> )                  | 1.01                 | 0.93-1.09  | 0.77    |                        |            |         |
| Ethnicity                                 |                      |            |         |                        |            |         |
| Caucasian                                 | -                    | -          | -       |                        |            |         |
| Hispanic                                  | 1.98                 | 0.67-3.98  | 0.19    |                        |            |         |
| Other                                     | 0.87                 | 0.19-7.12  | 0.49    |                        |            |         |
| Clinical frailty score (score)            | 1.15                 | 0.87-1.89  | 0.12    |                        |            |         |
| <b>Aetiology</b>                          |                      |            |         |                        |            |         |
| Alcohol                                   | -                    | -          | -       | -                      | -          | -       |
| Viral                                     | 2.76                 | 1.12-6.76  | 0.03    | 2.51                   | 0.79-7.97  | 0.11    |
| Metabolic                                 | 0.85                 | 0.21-3.44  | 0.82    | 2.50                   | 0.55-11.28 | 0.23    |
| Other                                     | 0.64                 | 0.06-6.04  | 0.70    | 0.16                   | 0.01-2.65  | 0.20    |
| <b>Cause for ICU admission</b>            |                      |            |         |                        |            |         |
| Sepsis                                    | -                    | -          | -       | -                      | -          | -       |
| Bleeding                                  | 0.43                 | 0.18-1.03  | 0.06    | 0.48                   | 0.15-1.56  | 0.22    |
| Other                                     | 0.59                 | 0.23-1.49  | 0.26    | 0.51                   | 0.12-2.07  | 0.35    |
| <b>Laboratory</b>                         |                      |            |         |                        |            |         |
| Leukocytes (G/l)                          | 1.00                 | 0.96-1.04  | 0.90    |                        |            |         |
| INR                                       | 8.71                 | 1.20-63.10 | 0.03    |                        |            |         |
| Bilirubin (mg/dl)                         | 1.11                 | 1.01-1.23  | 0.02    |                        |            |         |
| AST (IU)                                  | 1.00                 | 0.99-1.01  | 0.68    |                        |            |         |
| Albumin (g/l)                             | 1.06                 | 0.98-1.16  | 0.12    |                        |            |         |
| Creatinine (mg/dl)                        | 1.45                 | 1.04-2.02  | 0.02    |                        |            |         |
| Sodium (mmol/l)                           | 0.99                 | 0.94-1.06  | 0.97    |                        |            |         |
| Lactate (mmol/l)                          | 1.55                 | 1.20-2.01  | 0.0009  |                        |            |         |
| Ammonia, (μmol/l)                         | 1.00                 | 0.99-1.01  | 0.85    |                        |            |         |
| CRP (mg/l)                                | 0.99                 | 0.99-1.01  | 0.86    |                        |            |         |
| <b>Organ failure</b>                      |                      |            |         |                        |            |         |
| Liver                                     | 2.94                 | 1.18-7.37  | 0.02    |                        |            |         |
| Kidney                                    | 2.35                 | 1.01-5.63  | 0.01    |                        |            |         |
| Brain                                     | 1.68                 | 0.87-6.64  | 0.12    |                        |            |         |
| Coagulation                               | 7.81                 | 2.72-22.37 | 0.0002  |                        |            |         |
| Circulation                               | 4.20                 | 1.88-9.41  | 0.0005  |                        |            |         |
| Lungs                                     | 3.20                 | 1.55-6.60  | 0.009   |                        |            |         |
| <b>Organ support</b>                      |                      |            |         |                        |            |         |
| RRT                                       | 4.82                 | 1.63-14.21 | 0.005   |                        |            |         |
| Vasopressors                              | 4.20                 | 1.88-9.41  | 0.0005  |                        |            |         |
| Mechanical ventilation                    | 2.36                 | 1.15-5.23  | 0.02    |                        |            |         |
| <b>Scores</b>                             |                      |            |         |                        |            |         |
| MELD                                      | 1.13                 | 1.07-1.20  | <0.0001 |                        |            |         |
| ACLF grade                                | 3.10                 | 1.90-5.02  | <0.0001 |                        |            |         |
| CLIF-C ACLF                               | 1.17                 | 1.10-1.25  | <0.0001 |                        |            |         |
| CLIF-C ACLF lactate                       | 1.18                 | 1.11-1.27  | <0.0001 | 1.18                   | 1.13-1.27  | <0.0001 |
| <b>Body composition parameters</b>        |                      |            |         |                        |            |         |
| L3SMI (cm <sup>2</sup> /m <sup>2</sup> )* | 0.97                 | 0.93-0.99  | 0.04    | 0.98                   | 0.93-1.01  | 0.07    |
| Sarcopenia (L3SMI cut-offs)*              | 4.11                 | 1.64-10.31 | 0.002   | 1.95                   | 0.95-6.79  | 0.06    |
| SMRA (HU)                                 | 0.99                 | 0.94-1.04  | 0.79    |                        |            |         |
| IMATI (cm <sup>2</sup> /m <sup>2</sup> )  | 0.96                 | 0.89-1.03  | 0.33    |                        |            |         |
| VATI (cm <sup>2</sup> /m <sup>2</sup> )   | 0.98                 | 0.97-1.01  | 0.13    |                        |            |         |
| SATI (cm <sup>2</sup> /m <sup>2</sup> )   | 1.00                 | 0.98-1.01  | 0.84    |                        |            |         |
| VSR                                       | 0.75                 | 0.36-1.52  | 0.42    |                        |            |         |
| VAT-RA (HU) ¶                             | 1.06                 | 1.01-1.13  | 0.02    | 1.04                   | 0.95-1.12  | 0.23    |
| SAT-RA (HU) ¶                             | 1.02                 | 0.99-1.05  | 0.09    | 1.03                   | 0.98-1.08  | 0.18    |
| SAT-RA (HU), according to (27)            | 1.76                 | 0.62-4.92  | 0.28    |                        |            |         |

\*Not included in the same multivariable analysis to avoid collinearity

¶ Not included in the same multivariable analysis due to collinearity (Spearman: 0.79 DF 91, p<0.0001)

**Table S6:** Univariable and multivariable analyses of predictors of 28-day mortality in female patients from Lausanne cohort on day 3 (n=42)

| Covariant                                 | Univariable analysis |             |         | Multivariable analysis |           |         |
|-------------------------------------------|----------------------|-------------|---------|------------------------|-----------|---------|
|                                           | OR                   | 95% CI      | p value | OR                     | 95% CI    | p value |
| <b>Characteristics</b>                    |                      |             |         |                        |           |         |
| Age (years)                               | 1.03                 | 0.97-1.08   | 0.25    |                        |           |         |
| Sex (male)                                | -                    | -           | -       |                        |           |         |
| BMI (kg/m <sup>2</sup> )                  | 0.97                 | 0.85-1.12   | 0.75    |                        |           |         |
| Ethnicity                                 |                      |             |         |                        |           |         |
| Caucasian                                 | -                    | -           | -       |                        |           |         |
| Hispanic                                  | 1.91                 | 0.21-10.41  | 0.23    |                        |           |         |
| Other                                     | 0.98                 | 0.18-7.93   | 0.71    |                        |           |         |
| Clinical frailty scale (score)            | 1.11                 | 0.81-2.23   | 0.17    |                        |           |         |
| <b>Aetiology</b>                          |                      |             |         |                        |           |         |
| Alcohol                                   | -                    | -           | -       |                        |           |         |
| Viral                                     | 1.11                 | 0.14-8.22   | 0.91    |                        |           |         |
| Metabolic                                 | 1.11                 | 0.19-6.290  | 0.89    |                        |           |         |
| Other                                     | 1.67                 | 0.24-11.26  | 0.59    |                        |           |         |
| <b>Cause for ICU admission</b>            |                      |             |         |                        |           |         |
| Sepsis                                    | -                    | -           | -       |                        |           |         |
| Bleeding                                  | 0.64                 | 0.11-3.50   | 0.61    |                        |           |         |
| Other                                     | 0.70                 | 0.17-2.84   | 0.62    |                        |           |         |
| <b>Laboratory</b>                         |                      |             |         |                        |           |         |
| Leukocytes (G/l)                          | 1.07                 | 0.96-1.20   | 0.19    |                        |           |         |
| INR                                       | 1.49                 | 0.74-3.00   | 0.18    |                        |           |         |
| Bilirubin (mg/dl)                         | 1.07                 | 1.01-1.20   | 0.04    |                        |           |         |
| AST (IU)                                  | 1.00                 | 0.99-1.01   | 0.16    |                        |           |         |
| Albumin (g/l)                             | 1.12                 | 0.98-1.27   | 0.09    |                        |           |         |
| Creatinine (mg/dl)                        | 1.21                 | 0.70-2.08   | 0.47    |                        |           |         |
| Sodium (mmol/l)                           | 1.00                 | 0.91-1.11   | 0.91    |                        |           |         |
| Lactate (mmol/l)                          | 1.37                 | 1.01-2.01   | 0.03    |                        |           |         |
| Ammonia, (μmol/l)                         | 1.00                 | 0.99-1.01   | 0.29    |                        |           |         |
| CRP (mg/l)                                | 1.00                 | 0.99-1.01   | 0.62    |                        |           |         |
| <b>Organ failure</b>                      |                      |             |         |                        |           |         |
| Liver                                     | 6.89                 | 1.18-40.27  | 0.03    |                        |           |         |
| Kidney                                    | 2.50                 | 0.85-11.21  | 0.08    |                        |           |         |
| Brain                                     | 1.26                 | 0.85-4.21   | 0.20    |                        |           |         |
| Coagulation                               | 11.36                | 1.18-109.02 | 0.02    |                        |           |         |
| Circulation                               | 1.94                 | 1.02-6.94   | 0.03    |                        |           |         |
| Lungs                                     | 2.22                 | 1.13-4.38   | 0.03    |                        |           |         |
| <b>Organ support</b>                      |                      |             |         |                        |           |         |
| RRT                                       | 5.73                 | 1.21-61.12  | 0.02    |                        |           |         |
| Vasopressors                              | 1.94                 | 1.02-6.94   | 0.03    |                        |           |         |
| Mechanical ventilation                    | 12.85                | 1.47-112.17 | 0.02    |                        |           |         |
| <b>Scores</b>                             |                      |             |         |                        |           |         |
| MELD                                      | 1.10                 | 1.02-1.19   | 0.01    |                        |           |         |
| ACLF grade                                | 2.42                 | 1.15-5.12   | 0.009   |                        |           |         |
| CLIF-C ACLF                               | 1.21                 | 1.06-1.37   | 0.002   |                        |           |         |
| CLIF-C ACLF lactate                       | 1.21                 | 1.06-1.37   | 0.002   | 1.17                   | 1.05-1.32 | 0.004   |
| <b>Body composition parameters</b>        |                      |             |         |                        |           |         |
| L3SMI (cm <sup>2</sup> /m <sup>2</sup> )* | 2.60                 | 0.16-45.11  | 0.50    |                        |           |         |
| Sarcopenia (L3SMI cut-offs)               | 2.56                 | 0.69-9.49   | 0.13    |                        |           |         |
| SMRA (HU)                                 | 1.03                 | 0.93-1.14   | 0.52    |                        |           |         |
| IMATI (cm <sup>2</sup> /m <sup>2</sup> )  | 0.94                 | 0.85-1.05   | 0.33    |                        |           |         |
| VATI (cm <sup>2</sup> /m <sup>2</sup> )   | 1.00                 | 0.97-1.03   | 0.68    |                        |           |         |
| SATI (cm <sup>2</sup> /m <sup>2</sup> )   | 0.99                 | 0.98-1.01   | 0.65    |                        |           |         |
| VSR                                       | 1.49                 | 0.49-4.46   | 0.47    |                        |           |         |
| VAT-RA (HU)                               | 1.05                 | 0.96-1.14   | 0.24    |                        |           |         |
| SAT-RA (HU)                               | 1.04                 | 0.99-1.09   | 0.09    | 1.03                   | 0.94-1.14 | 0.40    |
| SAT-RA (HU), according to (27)            | 2.50                 | 0.66-11.01  | 0.15    |                        |           |         |

**Table S7:** Main characteristics comparison on day 1 between patients included in the overall Lausanne cohort (n=192) and patients included in the Villejuif external cohort (n=58). Continuous and categorical variables are expressed respectively in median (interquartile range) and N (percentages). Comparisons were performed using the Student's t-test or Mann-Whitney U test for quantitative variables or Chi-Square and Fisher exact tests for categorical variables as appropriate

|                                                     | Overall population included in the final analyses (n=192) | External cohort from Villejuif (N=58) | p       |
|-----------------------------------------------------|-----------------------------------------------------------|---------------------------------------|---------|
| <b>Characteristics</b>                              |                                                           |                                       |         |
| Age (years)                                         | 62.0 (53.2-70.0)                                          | 55.3 (48.7-62.9)                      | 0.0002  |
| Sex (male)                                          | 141 (73.5)                                                | 46 (79.3)                             | 0.36    |
| BMI (kg/m <sup>2</sup> )                            | 25.8 (22.3-31.2)                                          | 28.0 (24.0-32.0)                      | 0.09    |
| Ethnicity                                           |                                                           |                                       |         |
| Causasian                                           | 161 (83.8)                                                | 38 (65.5)                             | <0.0001 |
| Hispanic                                            | 16 (8.3)                                                  | 11 (19.0)                             |         |
| Other                                               | 15 (7.8)                                                  | 9 (15.5)                              |         |
| Clinical frailty scale (score)                      | 4.0 (3.0-4.0)                                             | 3.0 (3.0-4.0)                         | 0.21    |
| <b>Aetiology</b>                                    |                                                           |                                       |         |
| Alcohol                                             | 129 (67.2)                                                | 46 (79.3)                             | 0.02    |
| Viral                                               | 34 (17.7)                                                 | 3 (5.2)                               |         |
| Metabolic                                           | 18 (9.4)                                                  | 7 (12.1)                              |         |
| Other                                               | 11 (5.7)                                                  | 2 (3.5)                               |         |
| <b>Precipitating event</b>                          |                                                           |                                       |         |
| Sepsis                                              | 79 (41.1)                                                 | 23 (39.7)                             | 0.23    |
| Bleeding                                            | 63 (32.8)                                                 | 16 (27.6)                             |         |
| Other                                               | 50 (26.1)                                                 | 19 (32.7)                             |         |
| <b>Laboratory on day 1</b>                          |                                                           |                                       |         |
| Leukocytes (G/l)                                    | 15.0 (10.1-20.8)                                          | 11.5 (6.4-14.8)                       | 0.001   |
| INR                                                 | 1.5 (1.3-1.8)                                             | 2.5 (2.1-3.6)                         | <0.0001 |
| Bilirubin (mg/dl)                                   | 5.3 (3.7-8.2)                                             | 12.8 (4.2-19.6)                       | <0.0001 |
| AST (IU)                                            | 93.0 (48.0-299.5)                                         | 95.0 (65.0-197.5)                     | 0.11    |
| Albumin (g/l)                                       | 27.0 (23.2-31.0)                                          | 28.0 (24.0-32.0)                      | 0.26    |
| Creatinine (mg/dl)                                  | 1.4 (1.0-2.1)                                             | 1.5 (1.2-2.3)                         | 0.42    |
| Sodium (mmol/l)                                     | 138.0 (134.0-141.0)                                       | 138.0 (134.0-142.0)                   | 0.93    |
| Lactate (mmol/l)                                    | 4.1 (2.4-7.4)                                             | 2.7 (1.5-4.3)                         | 0.20    |
| CRP (mg/l)                                          | 55.0 (20.0-112.5)                                         | 35.0 (18.0-72)                        | 0.02    |
| <b>ACLF grade on day 1</b>                          |                                                           |                                       |         |
| 0                                                   | 0 (0)                                                     | 0 (0)                                 | <0.0001 |
| 1                                                   | 26 (13.6)                                                 | 7 (12.1)                              |         |
| 2                                                   | 59 (30.7)                                                 | 15 (25.9)                             |         |
| 3                                                   | 107 (55.7)                                                | 36 (62.0)                             |         |
| <b>Scores on day 1</b>                              |                                                           |                                       |         |
| MELD                                                | 21.9 (15.1-27.9)                                          | 31.0 (25.0-37.0)                      | <0.0001 |
| CLIF-C ACLF                                         | 67.5 (51.8-72.7)                                          | 77.5 (73.5-82.9)                      | <0.0001 |
| CLIF-C ACLF-lactate                                 | 71.5 (64.1-80.2)                                          | 78.9 (72.2-87.8)                      | <0.0001 |
| <b>Outcome</b>                                      |                                                           |                                       |         |
| 28-day survival, % (95%CI)                          | 58.2 (51.2-65.2)                                          | 41.4 (28.7-54.0)                      | <0.0001 |
| <b>Body composition parameters</b>                  |                                                           |                                       |         |
| L3SMI (cm <sup>2</sup> /m <sup>2</sup> )            | 43.2 (37.1-50.1)                                          | 41.6 (36.2-49.4)                      | 0.71    |
| Sarcopenia according to L3SMI sex specific cut-offs | 121 (63.0)                                                | 41 (70.7)                             | 0.25    |
| SMRA (HU)                                           | 36.0 (31.0-41.0)                                          | 30.3 (25.1-37.1)                      | 0.0004  |
| IMATI (cm <sup>2</sup> /m <sup>2</sup> )            | 6.3 (3.9-10.0)                                            | 4.0 (3.2-5.2)                         | <0.0001 |
| VATI (cm <sup>2</sup> /m <sup>2</sup> )             | 44.3 (24.4-69.9)                                          | 30.4 (14.2-48.7)                      | <0.0001 |
| SATI (cm <sup>2</sup> /m <sup>2</sup> )             | 48.6 (27.0-70.3)                                          | 43.6 (29.7-74.6)                      | 0.48    |
| VSR                                                 | 0.9 (0.6-1.4)                                             | 0.7 (0.4-1.1)                         | 0.009   |
| VAT-RA (HU)                                         | -81.2 (-88.5 to -75.8)                                    | -72.6 (-79.1 to -69.4)                | <0.0001 |
| SAT-RA (HU)                                         | -86.6 (-95.7 to -76.8)                                    | -77.6 (-86.1 to -65.5)                | <0.0001 |
